# Supplementary material
Source: HighWire-hosted journal article supplement (https://www.cmajopen.ca/highwire/filestream/89978/field_highwire_adjunct_files/2/open-2022-0151-credes-checklist.pdf)
Supplement: open-2022-0151-credes-checklist.pdf [file open-2022-0151-credes-checklist.pdf]

CREDES Checklist for reporting of Delphi studies

|                                                         |                                          | Page location in the main document |
|---------------------------------------------------------|------------------------------------------|------------------------------------|
| <b>Rationale for the choice of the Delphi technique</b> | Justification                            | Page 5                             |
| <b>Planning and design</b>                              | Planning and process                     | Pages 5-7                          |
|                                                         | Definition of consensus                  | Pages 6-7                          |
| <b>Study conduct</b>                                    | Information input                        | Page 6                             |
|                                                         | Prevention of bias                       | Page 6                             |
|                                                         | Interpretation and processing of results | Page 6-7                           |
|                                                         | External validation                      | N/A                                |
| <b>Reporting</b>                                        | Purpose and rationale                    | Page 4                             |
|                                                         | Expert panel                             | Page 8                             |
|                                                         | Description of the methods               | Pages 5-7                          |
|                                                         | Procedure                                | Pages 5-7                          |
|                                                         | Definition and attainment of consensus   | Pages 6-7, 9                       |
|                                                         | Results                                  | Pages 7-18                         |
|                                                         | Discussion of limitations                | Pages 20-21                        |
|                                                         | Conclusions                              | Page 21                            |
|                                                         | Publication and dissemination            | N/A                                |
